# Supplementary material for: Importance of counter-ions in alkali and alkaline-earth cation extraction by 18-crown-6: molecular dynamics studies at the water/sc-CO2interface
Source: Royal Society of Chemistry journal article supplement (doi:10.1039/b303058j), 2003-01-01
Supplement: b303058j.doc [file b303058j.doc]

| Systems | **T (K)** | **solvent** | **18C6** | **Mn+** | | **X–** | | **total** |
| --- | --- | --- | --- | --- | --- | --- | --- | --- |
| 25 K+,Pic– | 305 K | CO2 |  | 0 |  |  | -2 | -2 |
| wat |  | -113 |  |  | -126 | -239 |
|  | 350 K | CO2 |  | 0 |  |  | -2 | -2 |
| wat |  | -117 |  |  | -121 | -238 |
| 25 K+,PFO– | 305 K | CO2 |  | 0 |  | -7 |  | -7 |
| wat |  | -106 |  | -92 |  | -198 |
|  | 350 K | CO2 |  | 0 |  | -6 |  | -6 |
| wat |  | -100 |  | -86 |  | -186 |
| 25 Sr2+,2Pic– | 305 K | CO2 |  |  | 0 |  | -5 | -10 |
| wat |  |  | -240 |  | -67 | -374 |
|  | 350 K | CO2 |  |  | 0 |  | -4 | -8 |
| wat |  |  | -238 |  | -53 | -344 |
| 25 Sr2+,2PFO– | 305 K | CO2 |  |  | -1 | -10 |  | -21 |
| wat |  |  | -286 | -51 |  | -388 |
|  | 350 K | CO2 |  |  | 0 | -11 |  | -22 |
| wat |  |  | -276 | -31 |  | -338 |
| 25 NEt4+,PFO– | 305 K | CO2 |  | -2 |  | -6 |  | -8 |
| wat |  | -13 |  | -87 |  | -100 |
|  | 350 K | CO2 |  | -2 |  | -6 |  | -8 |
| wat |  | -14 |  | -76 |  | -90 |
| 1 K+18C6,Pic– | 350 K | CO2 | -6 | -1 |  |  | -12 | -19 |
| wat | 15 | -192 |  |  | 8 | -169 |
| 1 K+18C6,PFO– | 350 K | CO2 | -12 | 0 |  | -10 |  | -22 |
| wat | -27 | -134 |  | -111 |  | -272 |
| 1 Sr2+18C6,2Pic– | 350 K | CO2 | -7 |  | -1 |  | -20 | -48 |
| wat | 2 |  | -59 |  | -43 | -143 |
| 1 Sr2+18C6,2PFO– | 350 K | CO2 | -8 |  | 0 | -23 |  | -54 |
| wat | -6 |  | -43 | -34 |  | -117 |
| 25 K+18C6,Pic– | 305 K | CO2 | -7 | 0 |  |  | -2 | -9 |
| wat | -9 | -79 |  |  | -120 | -208 |
|  | 350 K | CO2 | -9 | 0 |  |  | -2 | -11 |
| wat | -19 | -104 |  |  | -109 | -232 |
| 25 K+18C6,PFO– | 305 K | CO2 | -7 | 0 |  | -6 |  | -13 |
| wat | -4 | -52 |  | -85 |  | -141 |
|  | 350 K | CO2 | -8 | 0 |  | -5 |  | -13 |
| wat | -13 | -78 |  | -77 |  | -168 |
| 25 Sr2+18C6,2Pic– | 305 K | CO2 | -4 |  | 0 |  | -10 | -24 |
| wat | -1 |  | -21 |  | -46 | -114 |
|  | 350 K | CO2 | -4 |  | 0 |  | -11 | -26 |
| wat | 1 |  | -25 |  | -40 | -104 |
| 25 Sr2+18C6,2PFO– | 305 K | CO2 | -5 |  | 0 | -14 |  | -33 |
| wat | 1 |  | -32 | -23 |  | -77 |
|  | 350 K | CO2 | -6 |  | 0 | -16 |  | -38 |
| wat | 1 |  | -33 | -20 |  | -72 |

**Table S1:** Energy component analysis for the KX and KX2 salts and the corresponding complexes with 18C6. Average interaction energies (kcal/mol) between one solute molecule and the water or CO2 phases calculated with a 15 Å + RF cutoff.

Fluctuations are about 5 kcal/mol.

| **Systems** | **T (K)** | **Nwat** | **NCO2** |
| --- | --- | --- | --- |
| 25 K+,Pic– | 305K | 0±0 | 33±3 |
| 350K | 5±4 | 36±6 |
| 25 K+,PFO– | 305K | 0±0 | 28±2 |
| 350K | 5±2 | 33±3 |
| 25 Sr2+,2Pic– | 305K | 1±1 | 27±2 |
| 350K | 3±2 | 40±4 |
| 25 Sr2+,2PFO– | 305K | 1±1 | 24±3 |
| 350K | 4±2 | 51±6 |
| 25 K+18C6,Pic– | 305K | 2±1 | 16±2 |
| 350K | 5±1 | 405±67 |
| 25 K+18C6,PFO– | 305K | 17±3 | 19±2 |
| 350K | 4±3 | 28±3 |
| 25 Sr2+18C6,2Pic– | 305K | 1±1 | 18±3 |
| 350K | 5±2 | 27±4 |
| 25 Sr2+18C6,2PFO– | 305K | 6±1 | 313±28 |
| 350K | 8±2 | 21±2 |
| 3 (Sr2+18C6,2PFO–) 22 (18C6 NEt4+ PFO–) | 350K | 12±6 | 41±4 |

**Table S2:** Solvent mixing in the simulated systems: number of water molecules (Nwat) in "bulk" CO2 and of CO2 molecules (NCO2) in "bulk" water. "Bulk" is defined beyond 10 Å from the two interfaces.

| Systems temp. (K) | (CF3)– CF2 – CF2 – CF2 – CF2 – CF2 – CF2– (CO2–) | | | | | | |
| --- | --- | --- | --- | --- | --- | --- | --- |
| 25 K+, PFO– 305 K | | 42 *(57)* | 87 *(12)* | 87 *(12)* | 51 *(48)* | 49 *(50)* |  |
| 25 K+, PFO– 350 K | | 11 *(88)* | 87 *( 9)* | 75 *(23)* | 59 *(38)* | 4 *(95)* |  |
| 25 Sr2+, 2 PFO– 305 K | | 34 *(65)* | 84 *(14)* | 73 *(25)* | 76 *(22)* | 31 *(68)* |  |
| 25 Sr2+, 2 PFO– 350 K | | 29 *(70)* | 76 *(22)* | 68 *(21)* | 61 *(36)* | 15 *(84)* |  |

**Table S3:** Percentage of *trans* / *gauche* (in parenthesis) C–C dihedrals of PFO– anions in the 25 K+PFO– and 25 Sr2+ (PFO–)2 systems at 305 K and 350 K.

| K+ | Pic– | 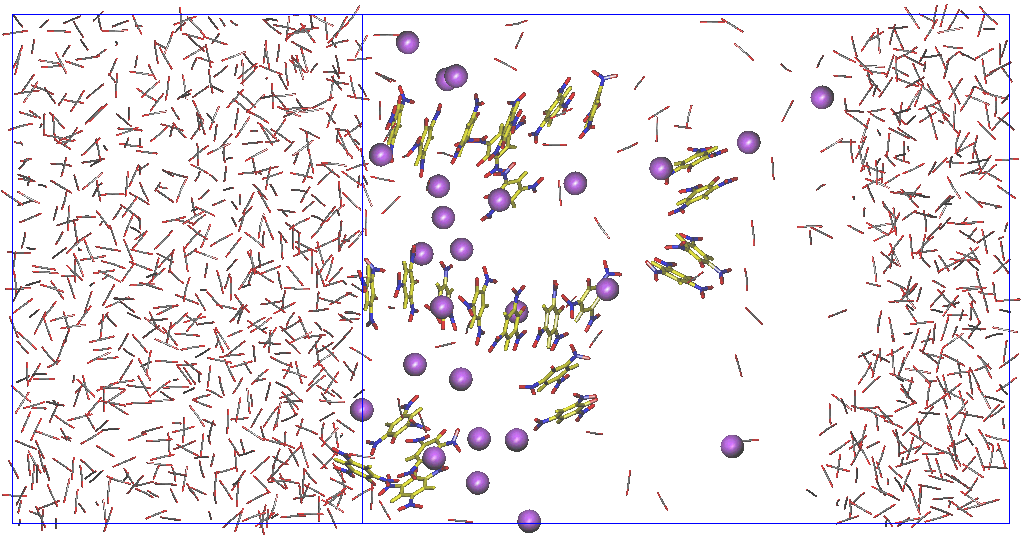 | 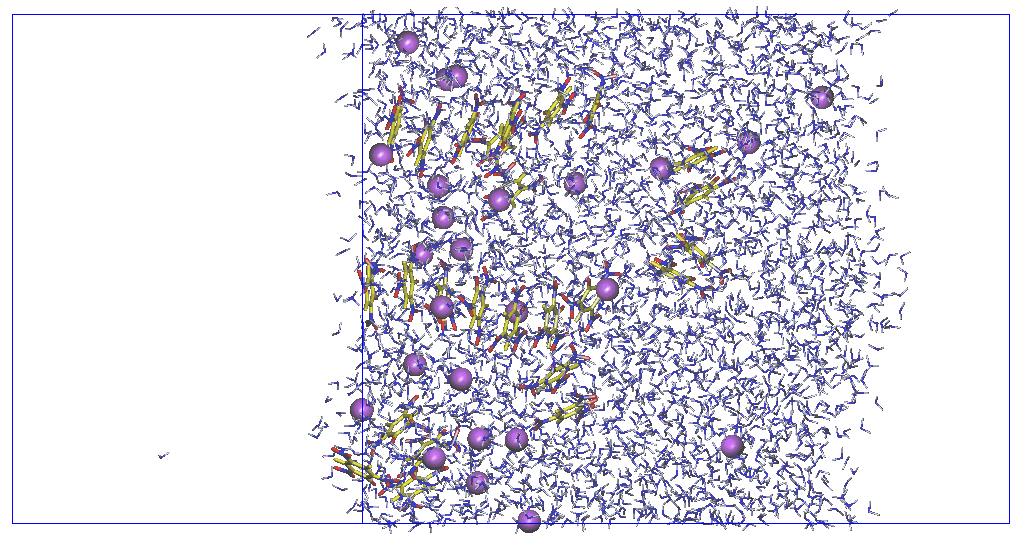 |  |
| --- | --- | --- | --- | --- |
| K+ | PFO– | 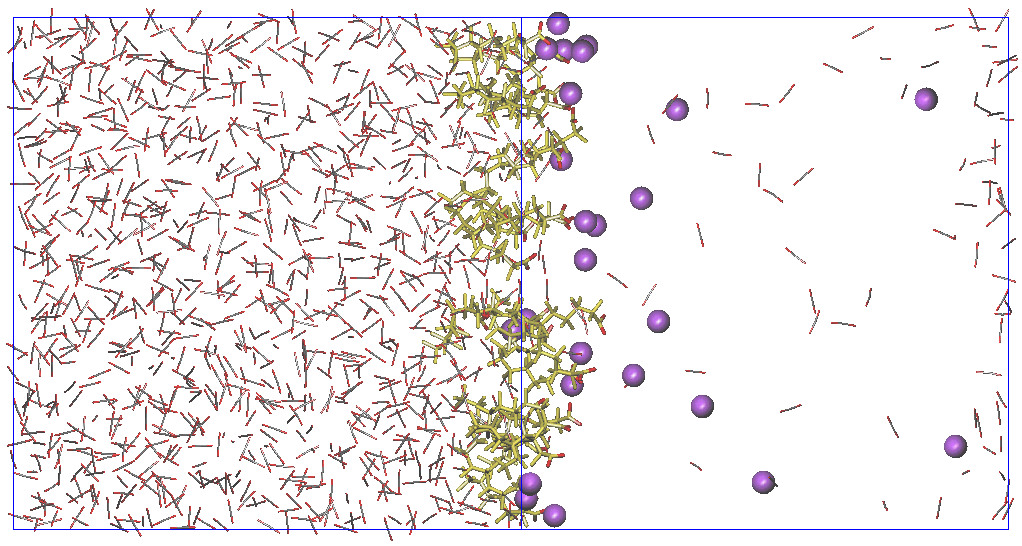 | 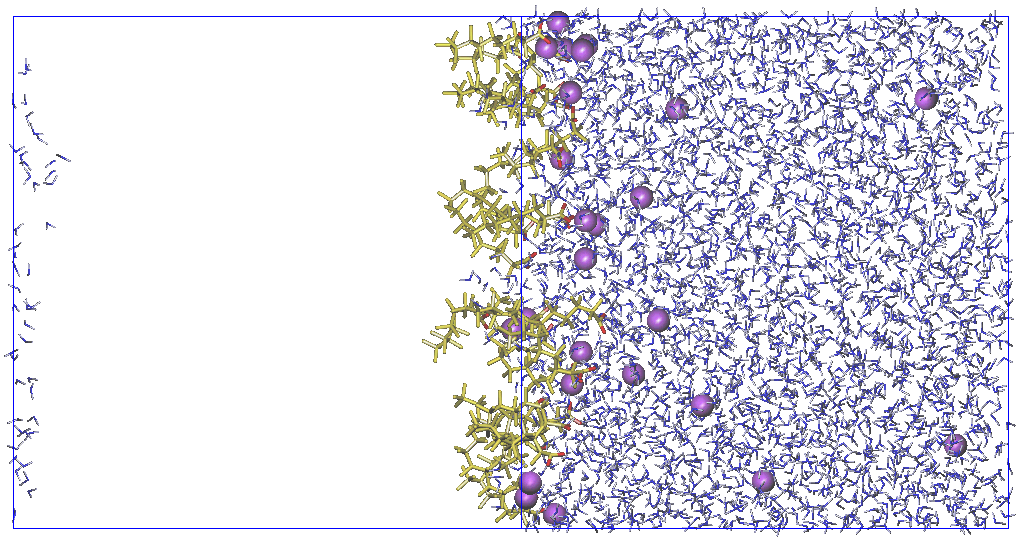 |  |
| Sr2+ | Pic– | 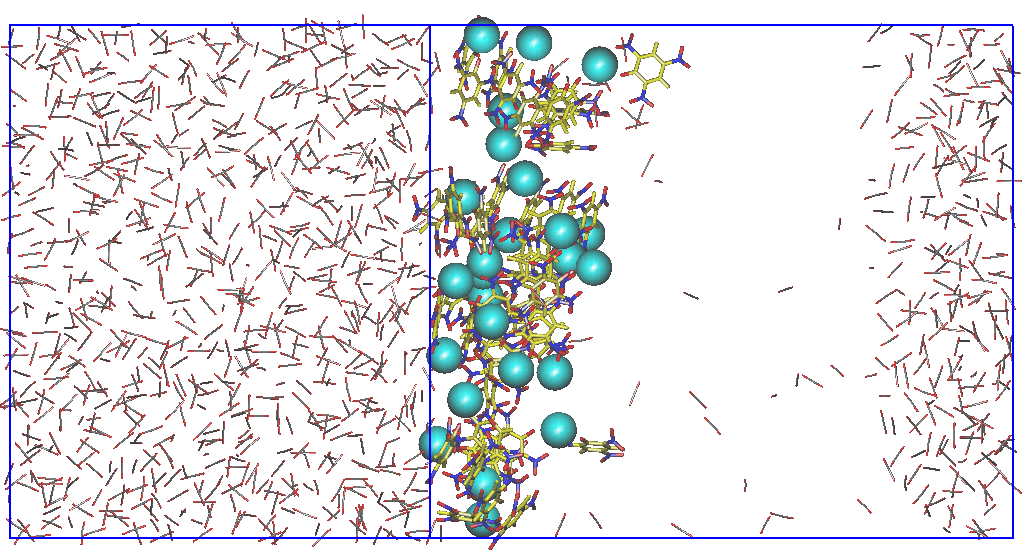 | 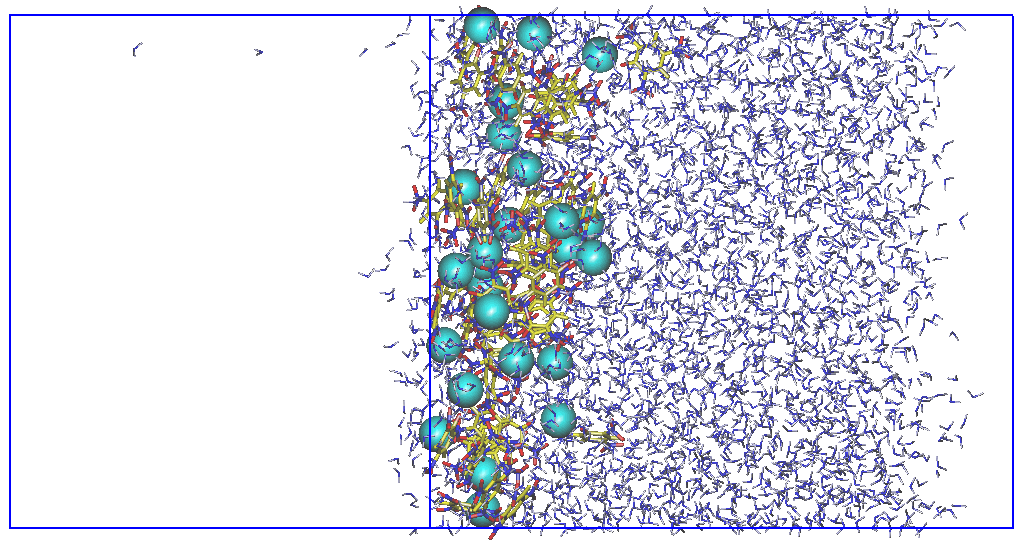 |  |
| Sr2+ | PFO– | 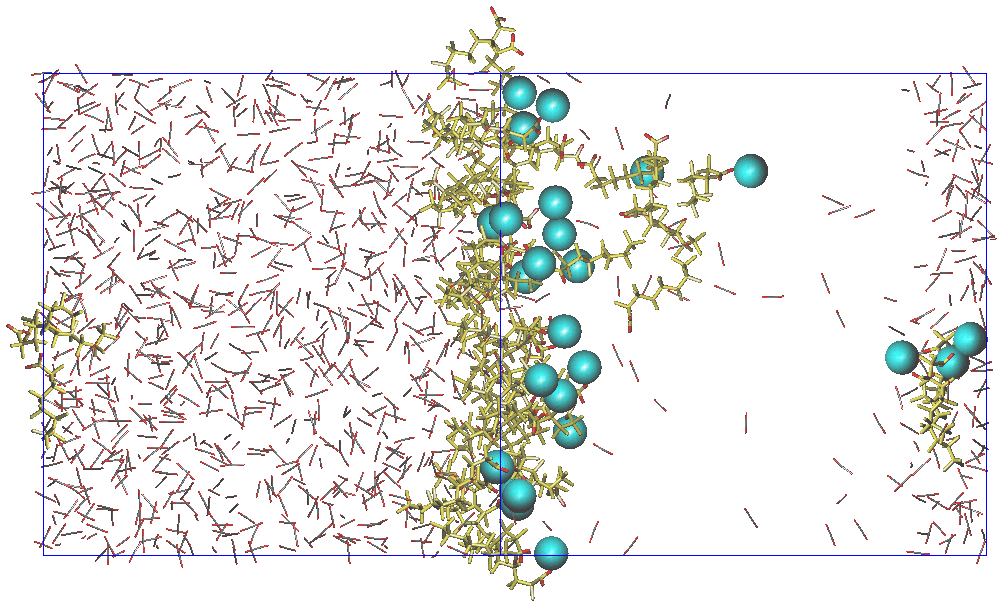 | 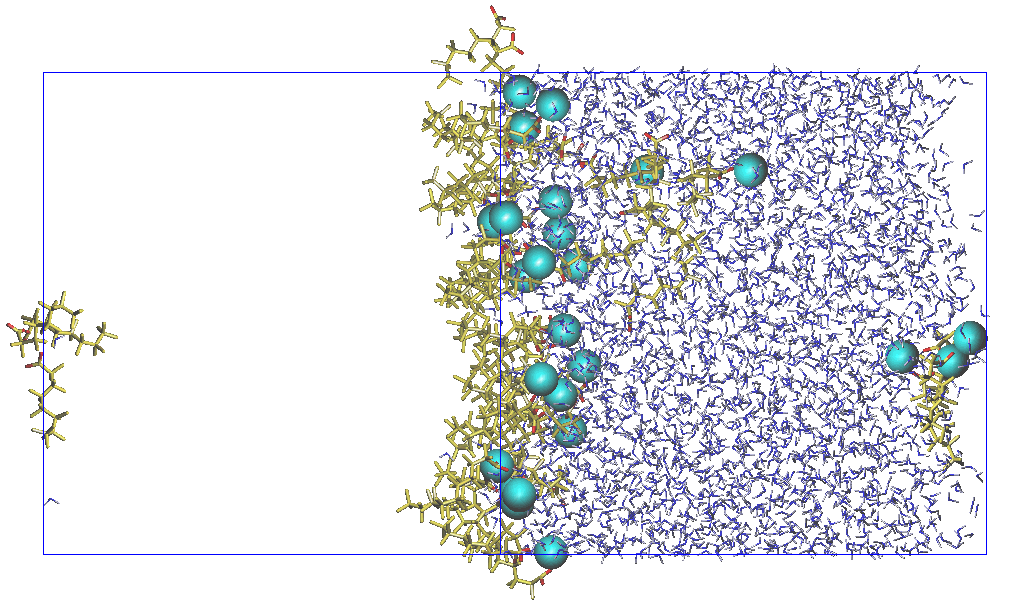 |  |
| NEt4+ | PFO– | 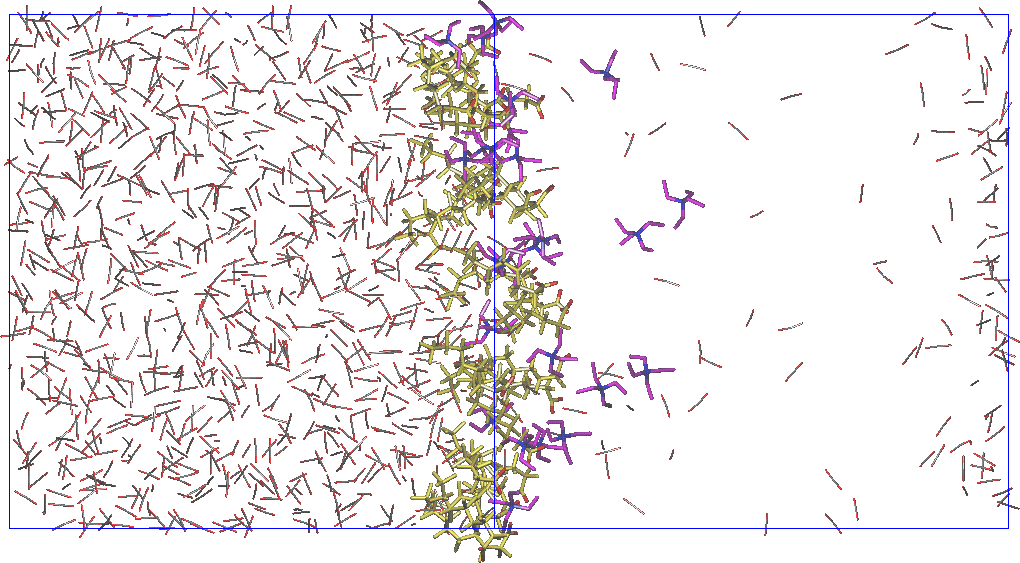 | 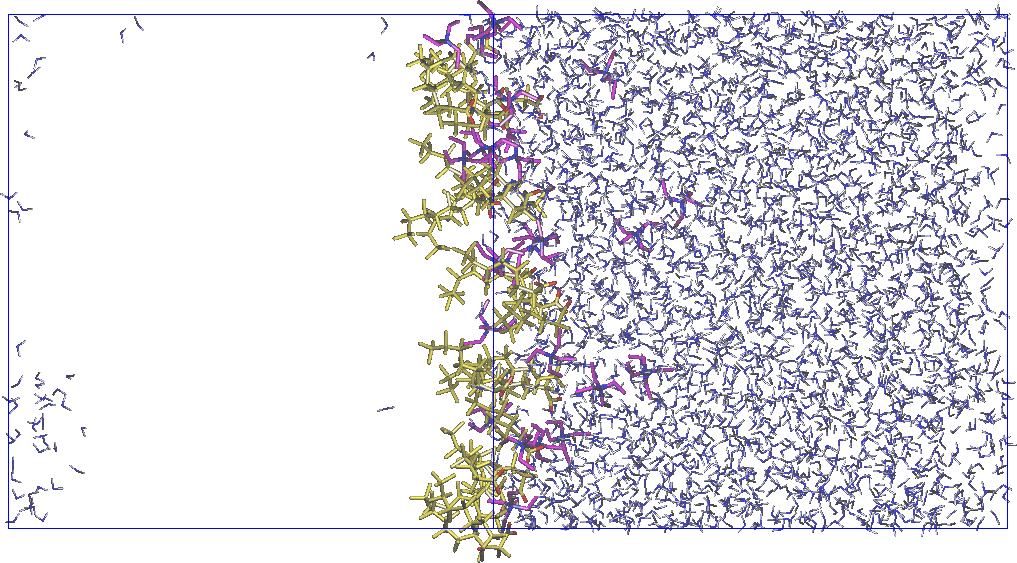 |  |

**Figure S1:** The 25 K+X–, 25 Sr2+(X–)2  (X– = Pic– *vs* PFO–) and 25 NEt4+, PFO– salts at the interface at 305 K. *Left* and *middle*: snapshots at the end of the simulation (1.2 ns), with water (*left*) and CO2 (*middle*) not shown for clarity. *Right*: average density curves for the solvents and solutes (arbitrary units). Averages over the last 0.2 ns.

**Figure S2:** The K+PFO– and NEt4+PFO– salts at the interface at 305 K and 350 K. Density profiles of the O(PFO–) and CF3(PFO–) atoms and of all atoms of the anions (red curve), of cations (blue) and of the solvents.

| K+ | Pic– | 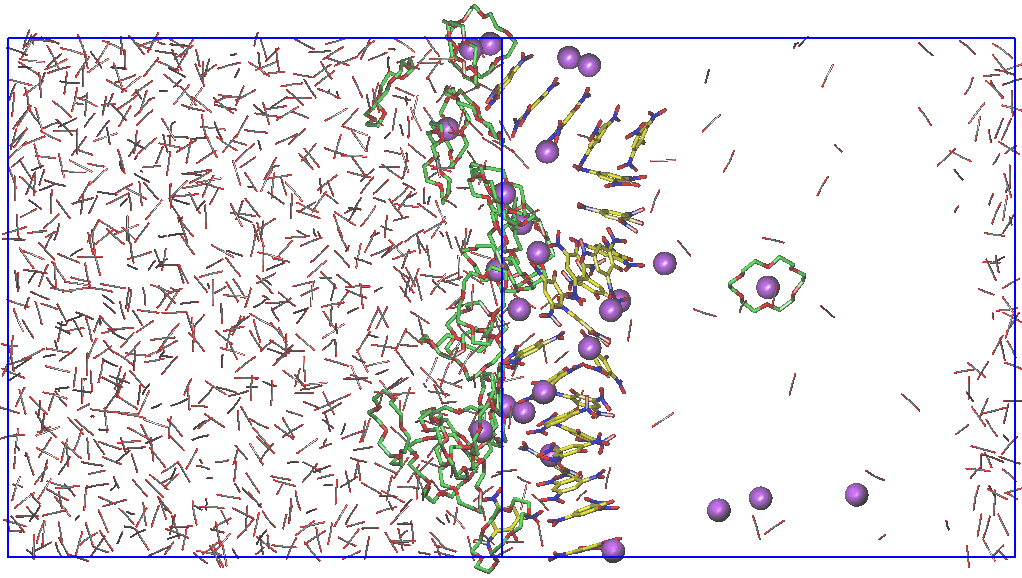 | 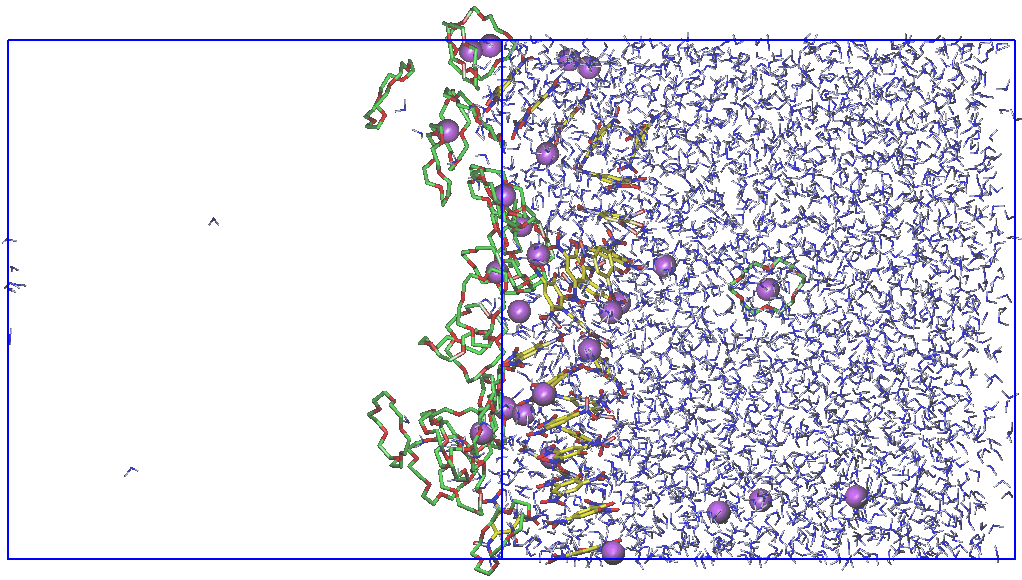 |  |
| --- | --- | --- | --- | --- |
| K+ | PFO– | 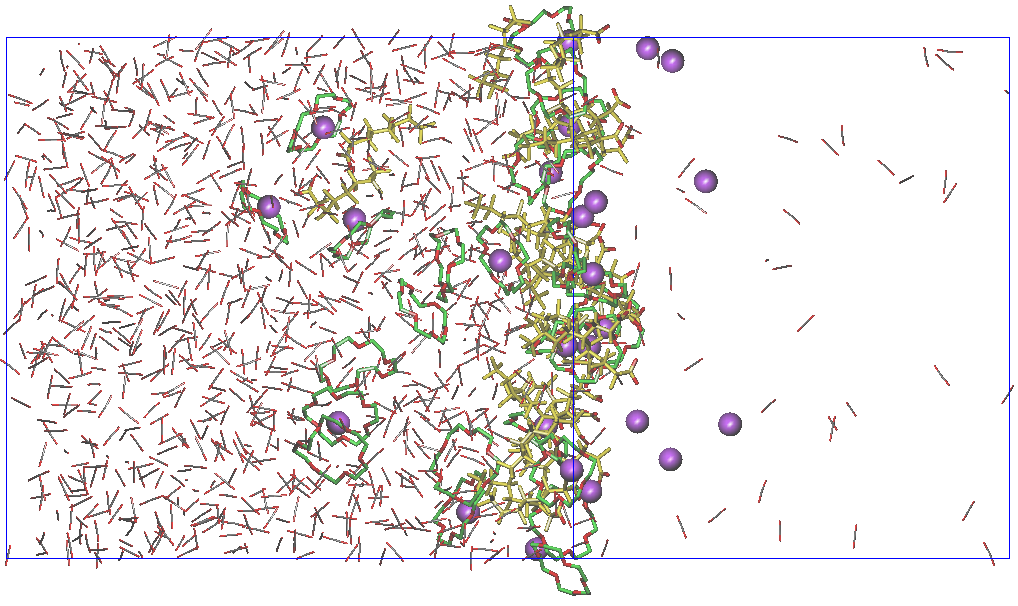 | 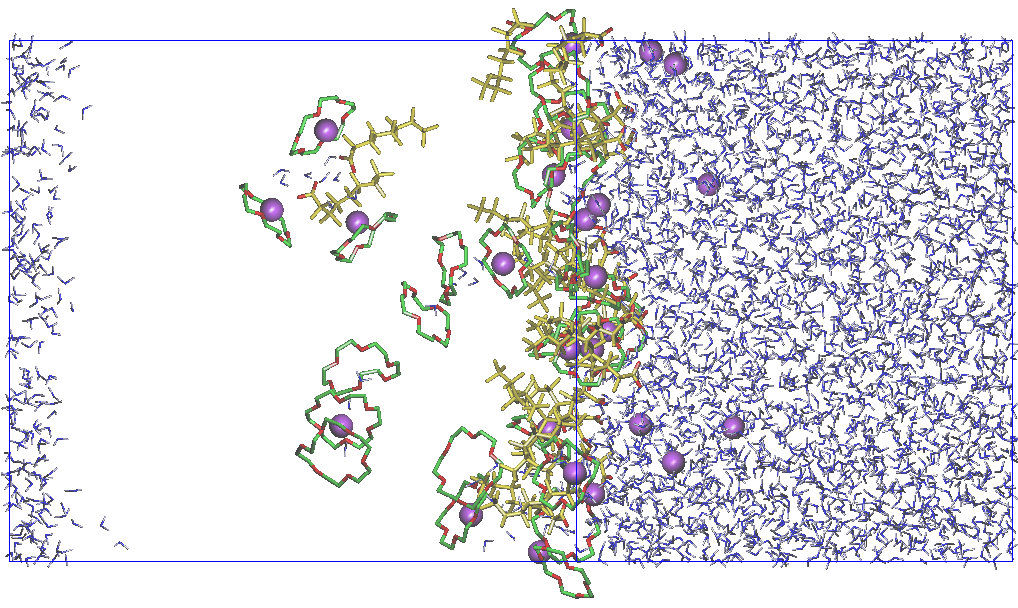 |  |
| Sr2+ | Pic– | 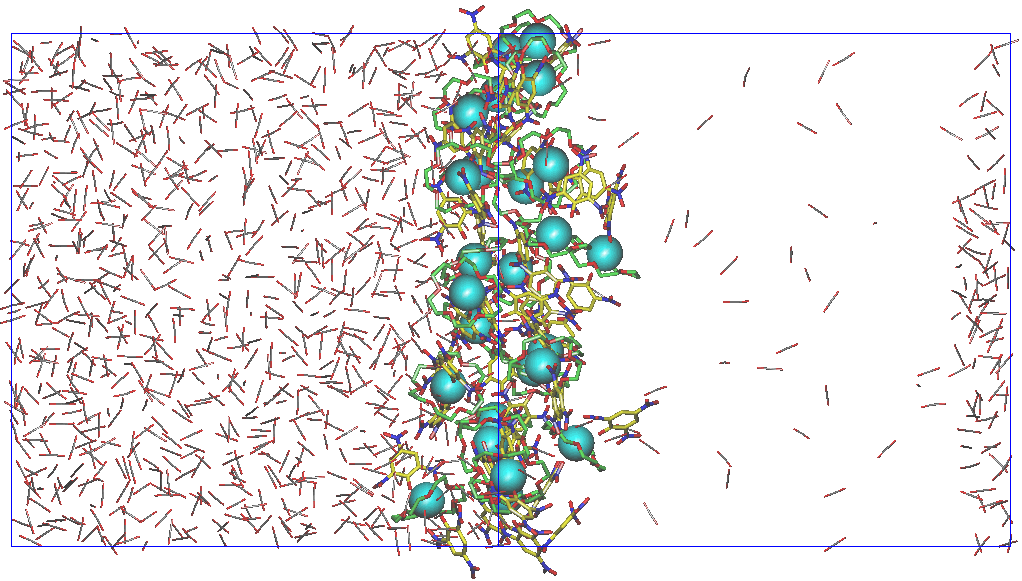 | 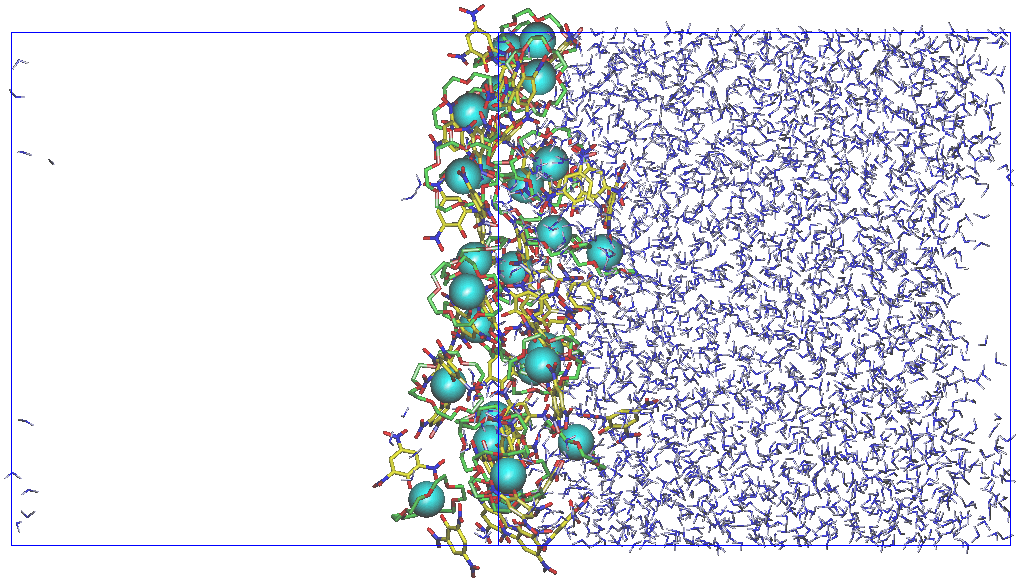 |  |
| Sr2+ | PFO– | 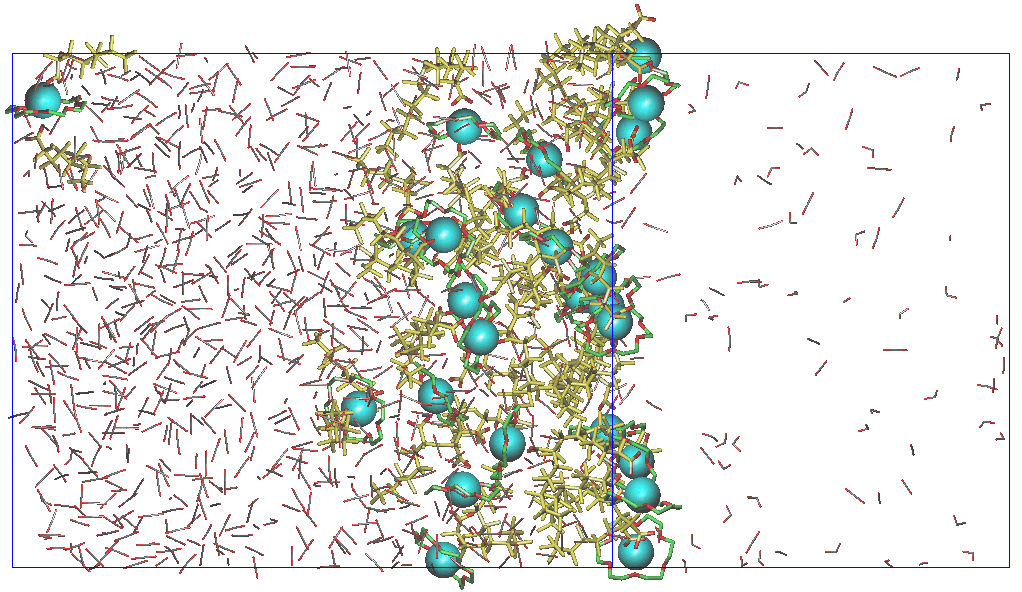 | 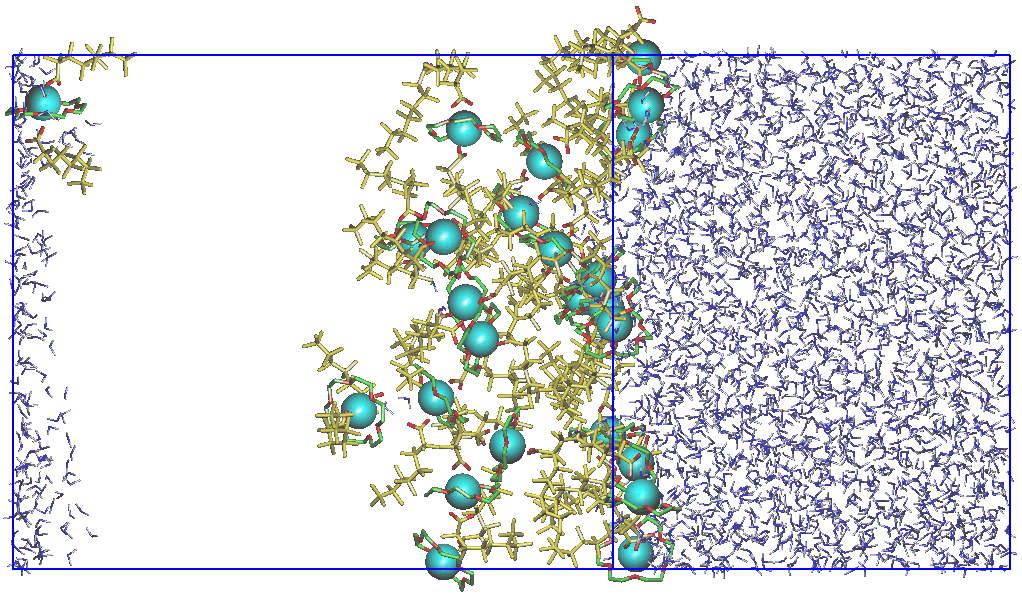 |  |

**Figure S3:** The 25 18C6,K+X– and 25 Sr2+18C6,2X– complexes (with X– = Pic– *vs* PFO–) at the interface at 305 K. See Figure 4 for definitions.
